# Supplementary material for: Facile fabrication of boron-doped titanium carbide for efficient electrocatalytic nitrogen reduction
Source: Royal Society of Chemistry journal article supplement (doi:10.1039/d3cy00726j), 2023-01-01
Supplement: d3cy00726j1.pdf [file d3cy00726j1.pdf]

# Facile fabrication of boron-doped titanium carbide for efficient electrocatalytic nitrogen reduction

Tao Leiming <sup>a,\*</sup>, Pang Kui <sup>a,b</sup>, Qin Wen <sup>a</sup>, Huang Liming <sup>a,c</sup>, Duan Linhai <sup>a</sup>, Zhu Guanhua <sup>a</sup>, Li Qiuye <sup>b,\*</sup>, Yu Changlin <sup>a,\*</sup>

<sup>a</sup> Guangdong Provincial Key Laboratory of Petrochemical Equipment Fault Diagnosis, School of Science, Guangdong University of Petrochemical Technology, Maoming, Guangdong, 525000, China.

<sup>b</sup> Engineering Research Center for Nanomaterials, Henan University, Henan, 475001, China

<sup>c</sup> School of Chemistry and Chemical Engineering, Guangxi University, Nanning, 530004, China

\* Corresponding author. E-mail address: leimingtao@foxmail.com (Tao Leiming), qiuyeli@henu.edu.cn (Li Qiuye), yuchanglinjx@163.com (Yu Changlin)

## Supporting information

### Experimental section

**Materials:** Titanium Aluminum Carbide powder ( $\text{Ti}_3\text{AlC}_2$ , 200 mesh), Hydrofluoric Acid (HF, 40%), Potassium hydroxide (KOH),  $\text{H}_2\text{O}_2$  (30 wt%), Salicylic acid ( $\text{C}_7\text{H}_6\text{O}_3$ ), hydrochloric acid (HCl), sodium hypochlorite ( $\text{NaClO}$ ) and Sodium hydroxide (NaOH), Nafion (5 wt%) solution, Nafion 117 membrane (DuPont). Hydrazine hydrate ( $\text{N}_2\text{H}_4 \cdot \text{H}_2\text{O}$ ), Ethanol ( $\text{CH}_3\text{CH}_2\text{OH}$ ), Sodium citrate dihydrate ( $\text{Na}_3\text{C}_6\text{H}_5\text{O}_7 \cdot 2\text{H}_2\text{O}$ ), p-dimethylaminobenzaldehyde (p- $\text{C}_9\text{H}_{11}\text{NO}$ ), Sodium nitroso ferricyanide dihydrate ( $\text{Na}_2[\text{Fe}(\text{CN})_5\text{NO}] \cdot 2\text{H}_2\text{O}$ ), All reagents were analytical grade and were used directly without further purification.

**Preparation of working electrode:** Carbon paper (CP) was cleaned via

brief sonication with ethanol and water for several times. To prepare the working electrode, the catalyst ink was prepared by dispersing 5 mg of  $\text{Ti}_3\text{C}_2\text{-B}$  catalyst dispersed into 1 mL ethanol containing 50  $\mu\text{L}$  of 5 wt% Nafion and kept ultrasonic for 1 h. Then 20  $\mu\text{L}$  of the catalyst ink was loaded on the CP (1 cm  $\times$  1 cm) and dried at room temperature.

**Preparation of  $\text{Ti}_3\text{C}_2\text{T}_x$  nanosheets:** 1 g  $\text{Ti}_3\text{AlC}_2$  was gradually added to 20 mL HF, and then magnetically stirred at room temperature for 24 h. Subsequently. The resulting solution was washed with distilled water, centrifuged at 4000 rpm for 10 min, and repeated several times until the supernatant pH approached 7. Finally, Multi-layer MXenes powder is then collected by freeze-drying.  $\text{Ti}_3\text{C}_2\text{T}_x$  flakes were dispersed in 1.8 mol $\cdot\text{L}^{-1}$  KOH aqueous solution (1 g MXene per 20 mL KOH aqueous solution). Then, the final product was washed using DI water for several times and dried as  $\text{Ti}_3\text{C}_2$ .

**Preparation of  $\text{Ti}_3\text{C}_2\text{-B}$  nanosheets:** 90 mg  $\text{Ti}_3\text{C}_2$  powder is uniformly dispersed in deionized water. Then, 100 mg  $\text{H}_3\text{BO}_3$  (the molar ratio of  $\text{H}_3\text{BO}_3$  to  $\text{Ti}_3\text{C}_2$  is 3:1) was added to the mixture (3 mg $\cdot\text{mL}^{-1}$ ) and stirred for 0.5 h. The suspension was transferred to a Teflon reactor and heated at 180  $^\circ\text{C}$  for 12 h to produce a gray-black precipitate. The final product was washed using DI water for several times and dried as  $\text{Ti}_3\text{C}_2\text{-B}$ .

**Characterizations:** X-ray diffraction (XRD) patterns from 5 $^\circ$  to 80 $^\circ$  were obtained using Cu Ka radiation at a scan rate of 10  $^\circ\text{s}^{-1}$  on an Ultima IV

X-ray diffractometer with an applied current and accelerating voltage of 40 mA and 40 kV, respectively. SEM images and EDX were characterized on Regulus 8220 scanning electron microscope with an accelerating voltage of 5 kV (HITACHI, Japan). TEM and HR-TEM images were detected by JEOL JEM-2100F (200 kV) transmission electron microscope operated. The XPS was carried out by Thermo Scientific escalab 250Xi. UV-Vis diffuse reflectance (DRS) absorption spectroscopy was performed on a SHIMADZU UV-2600i with BaSO<sub>4</sub> as a reference material in a scan range of 200–800 nm. Ion chromatography was used to measure the levels of NH<sub>3</sub> in the electrolytes using a Shine CIC-D100 ion chromatograph. Gas chromatograph (GC-2014C, SHIMADZU).

**Electrochemical measurements:** N<sub>2</sub> reduction experiments were performed in two compartments of cells under environmental conditions, separated by Nafion 117 membrane. The membrane is protonated by first re-treating in an aqueous H<sub>2</sub>O<sub>2</sub> (5 wt %) solution at 80 °C for 1 hour. Then, the membrane was immersed in 0.5 M H<sub>2</sub>SO<sub>4</sub> at 80 °C for 1 hour, and finally immersed in water for 6 hours. Electrochemical measurements were performed using an electrochemical workstation (CHI760E) in a standard three-electrode system, using Ti<sub>2</sub>C<sub>3</sub>-B / CP ( 1.0 cm × 1.0 cm ) as the working electrode, platinum mesh as the counter electrode and Ag / AgCl electrode ( saturated potassium chloride electrolyte ) as the reference electrode. All potentials measured are calibrated to reversible hydrogen

electrode (RHE) using the following equation:  $E \text{ (vs. RHE)} = E \text{ (vs. Ag / AgCl)} + 0.059 \times \text{pH} + 0.197 \text{ V}$ , and the current density presented is normalized to the geometric surface area. For  $\text{N}_2$  reduction experiments, chronoamperometry was performed at room temperature in  $\text{N}_2$ -saturated 0.05 M  $\text{H}_2\text{SO}_4$  solution ( $\text{N}_2$  purged  $\text{H}_2\text{SO}_4$  electrolyte for 60 min before measurement).

### **Determination of $\text{NH}_3$ :**

The electro-reduced ammonia was detected by ion chromatograph. In specific, 2 mL postelectrolyzed electrolyte was filtered by a nylon membrane filter (220 nm) and then injected directly into the ion chromatograph. The  $\text{NH}_4^+$  calibration curves were established by a set of standard solutions with different ammonia sulfide concentrations. The signal of  $\text{NH}_4^+$  in ion chromatograph spectra was located at 4.1 min.

The concentration of  $\text{NH}_3$  produced by spectrophotometry was determined by indophenol blue method. Usually, 2 mL of HCl electrolyte is taken out of the cathode chamber and 2 mL of 1 M NaOH solution containing 5 % salicylic acid and 5 % sodium citrate is added to the solution. Subsequently, 1 mL 0.05 M NaClO and 0.2 mL 1 %  $\text{C}_5\text{FeN}_6\text{Na}_2\text{O} \cdot 2\text{H}_2\text{O}$  were added to the above solution in turn. After standing at room temperature for 2 h, the UV-Vis absorption spectra were measured at a wavelength of 655 nm. Concentration-absorbance curves were calibrated with a range of concentrations of  $\text{NH}_3$  standard solutions.

The concentration-absorption curve was calibrated in 0.05 M H<sub>2</sub>SO<sub>4</sub> using NH<sub>4</sub><sup>+</sup> standard solutions with NH<sub>4</sub><sup>+</sup> concentrations of 0, 0.05, 0.1, 0.2, 0.4, 0.6, 0.8, and 1.0 μg·mL<sup>-1</sup>. The calibration curve below is used to calculate the NH<sub>3</sub> concentration. The fitting curve ( $y = 0.4862x - 0.00621$ ,  $R^2 = 0.999$ ) showed a good linear relationship between the absorbance value and the NH<sub>3</sub> concentration through three independent calibrations.

**Determination of N<sub>2</sub>H<sub>4</sub>:** The possible presence of N<sub>2</sub>H<sub>4</sub> in the electrolyte is estimated by the method of Watt and Chrisp. Usually, p-C<sub>9</sub>H<sub>11</sub>NO (5.99 g), HCl (30 mL) and C<sub>2</sub>H<sub>5</sub>OH (300 mL) are mixed and used as color reagents. Then, 5 mL of the electrolyte electrochemical reaction container is taken out from the solution, and 5 mL of the prepared color reagent is added. Stir at room temperature for 15 min. In addition, the absorbance of the resulting solution is measured at 455 nm. The concentration absorbance curve was calibrated using a standard N<sub>2</sub>H<sub>4</sub> solution with a series of concentrations.

**Calculations of NH<sub>3</sub> yield and FE:** The FE for N<sub>2</sub> reduction was defined as the amount of electric charge used for synthesizing NH<sub>3</sub> divided the total charge passed through the electrodes during the electrolysis. The total amount of NH<sub>3</sub> produced was measured using colorimetric methods. Assuming three electrons were needed to produce one NH<sub>3</sub> molecule, the FE could be calculated as follows:

$$FE(\%) = \frac{3 \times n_{NH_3} \times F}{Q} \quad (1)$$

Among them, FE (%) is the Faraday efficiency of NH<sub>3</sub>, 3 is the electron transfer number of each NH<sub>3</sub> molecule,  $n_{\text{NH}_3}$  is the total amount of ammonia generated during the electrolysis process (in mol), F is the Faraday constant (96485 C·mol<sup>-1</sup>), and Q is the total charge consumed during the electrolysis process (in C).

NH<sub>3</sub> yield was calculated using the following equation:

$$r_{\text{NH}_3} = \frac{n_{\text{NH}_3}}{t \times m_{\text{cat}}} \quad (2)$$

where  $r_{\text{NH}_3}$  is the yield of NH<sub>3</sub>,  $n_{\text{NH}_3}$  is the total amount of ammonia produced in the production process, t is the total time of electrolysis, and  $m_{\text{cat}}$  is the total mass of the catalyst.

### **DFT Calculations:**

In this work, all calculations were carried out with the standard DFT using Vienna ab initio Simulation Package (MedeA-VASP 3.6). The description of the exchange correlation adopted the generalized gradient approximation (GGA) of the Perdew, Burke, and Ernzerhof form. The plane wave energy cutoff was set to 500 eV. The generalized gradient approximation (GGA) with the Perdew-Burke-Ernzerhof (PBE) exchange-correlation functional. The Brillouin zone was sampled at Gamma point with the  $2 \times 2 \times 2$  k-point meshes for Ti<sub>3</sub>C<sub>2</sub> and Ti<sub>3</sub>C<sub>2</sub>-B surfaces. The energy and force criterion for convergence of the electron density were set at 10<sup>-5</sup> eV and 0.5 eV/Å, respectively. The vacuum space along z-direction was set to 19 Å to avoid interactions between adjacent images.

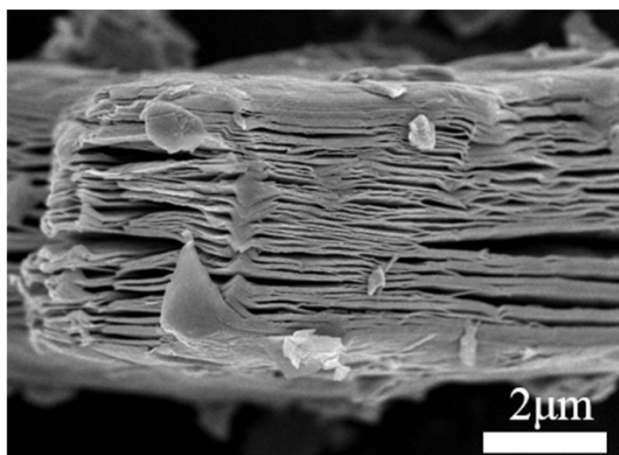

**Figure S1.** SEM images of Ti<sub>3</sub>C<sub>2</sub>.

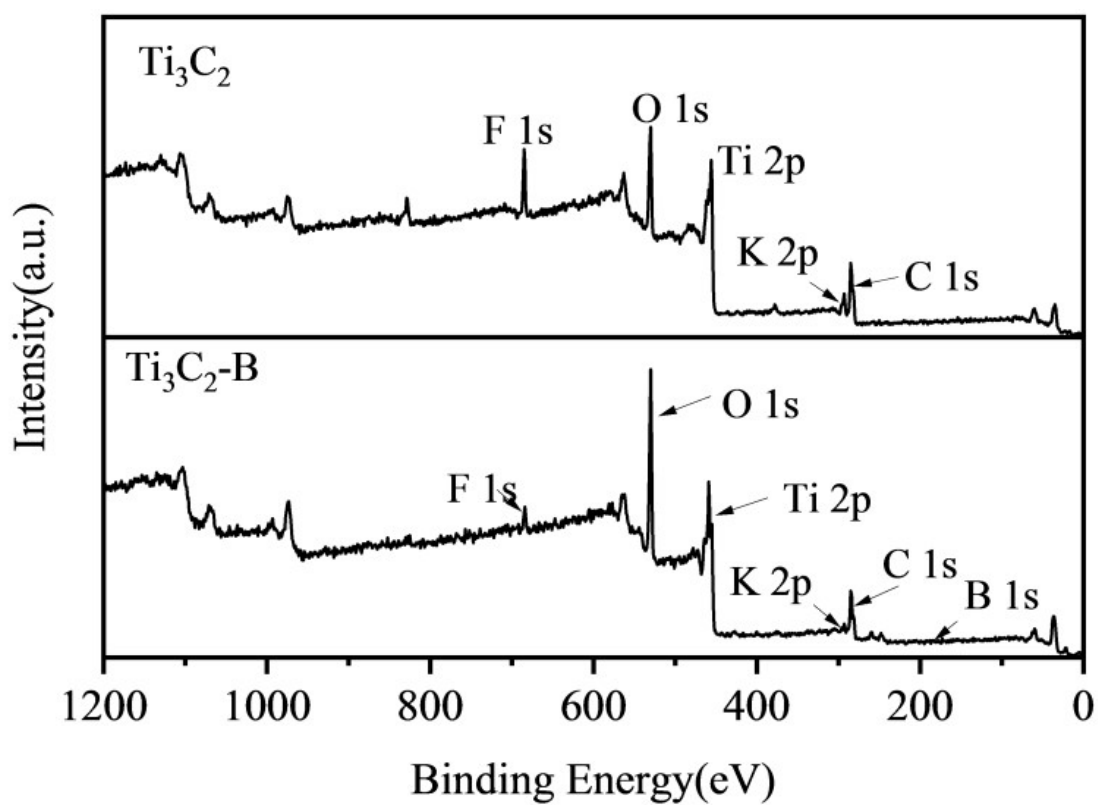

**Figure S2.** The survey XPS spectra of Ti<sub>3</sub>C<sub>2</sub> and Ti<sub>3</sub>C<sub>2</sub>-B.

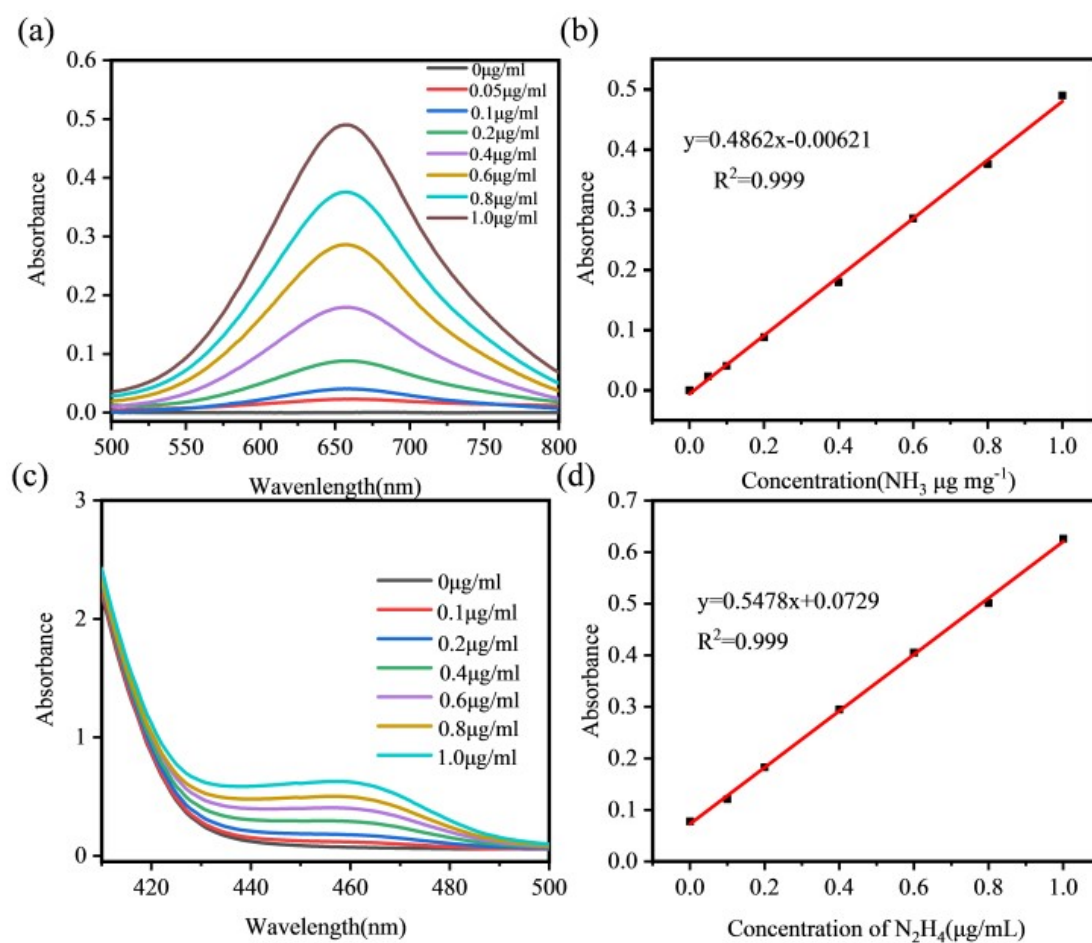

**Figure S3.** (a) UV-vis absorption spectra of as-prepared references with various  $\text{NH}_3$  concentrations after incubated for 2 h. (b) Calibration curve used for calculation of  $\text{NH}_3$  concentrations. (c) UV-vis absorption spectra of as-prepared references with various  $\text{N}_2\text{H}_4$  concentrations after incubated for 15 min. (d) Calibration curve used for calculation of  $\text{N}_2\text{H}_4$  concentrations.



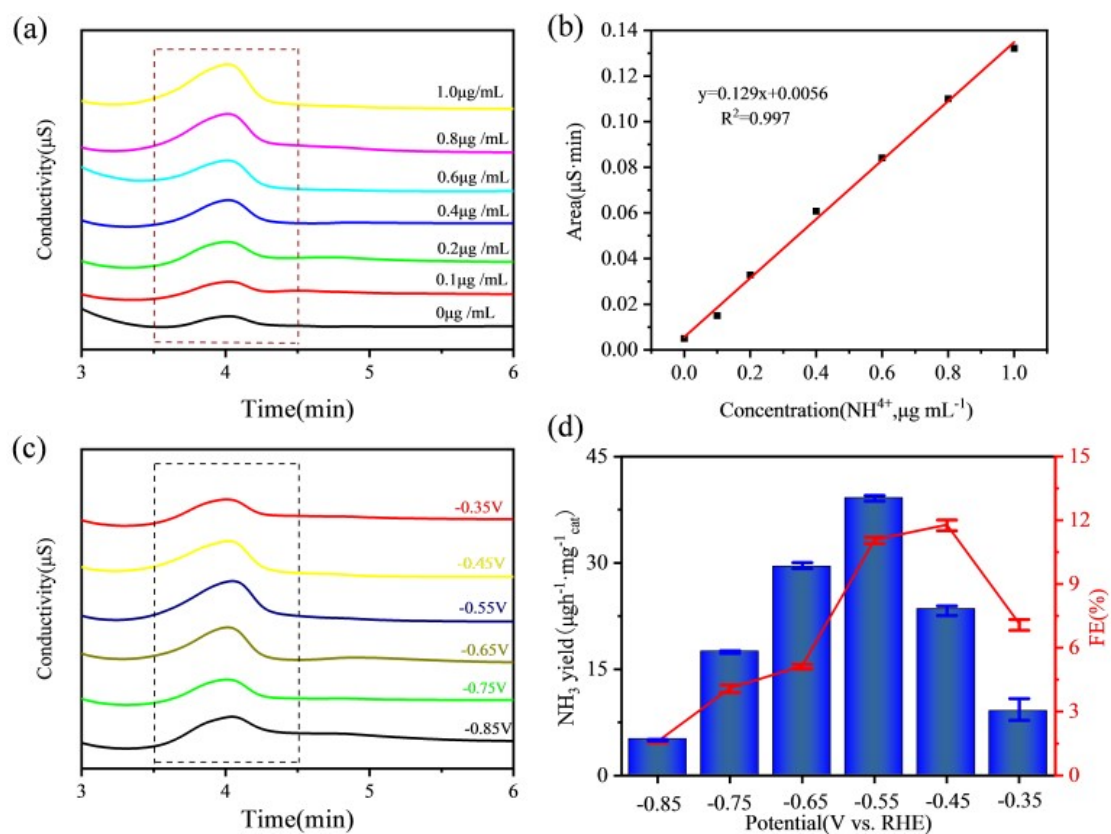

**Figure S4.** (a) Ion chromatography spectra of  $\text{NH}_4^+$  ions with different concentrations. (b) Corresponded calibration curve for  $\text{NH}_4^+$ . (c) Ion chromatography of  $\text{NH}_4^+$  ions spectra recorded at different potentials. (d) Corresponded FE and  $\text{NH}_3$  yield.

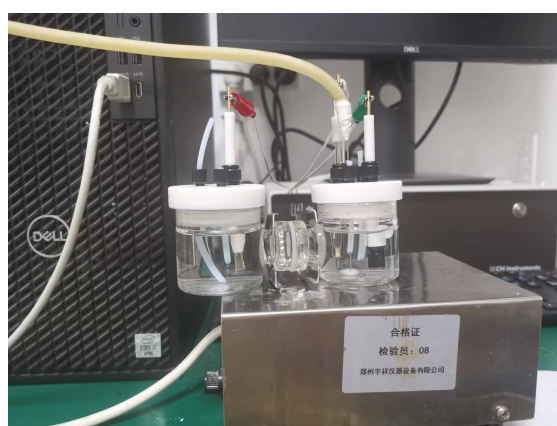

**Figure S5.** Diagram of electrochemical step for NRR test

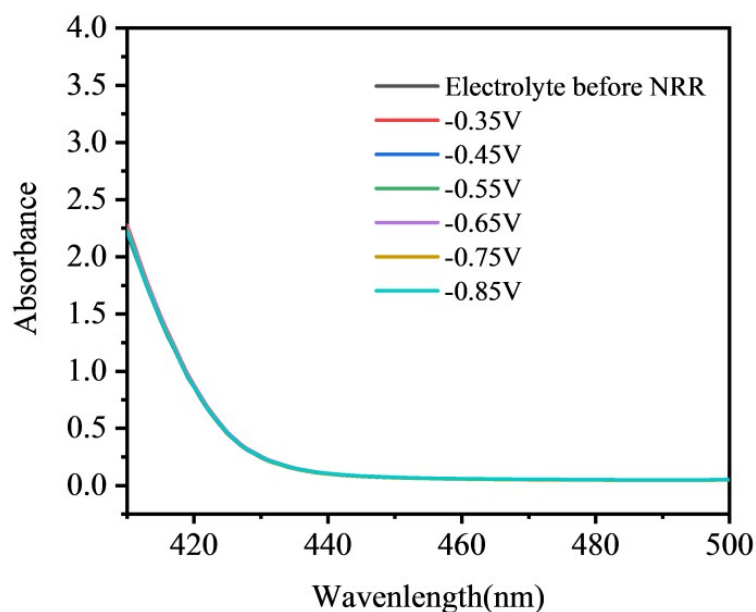

**Figure S6.** UV-vis absorption spectra of the electrolyte after N<sub>2</sub> electroreduction over Ti<sub>3</sub>C<sub>2</sub>-B at a series of potentials for 2 h via Watt and Chrisp method.

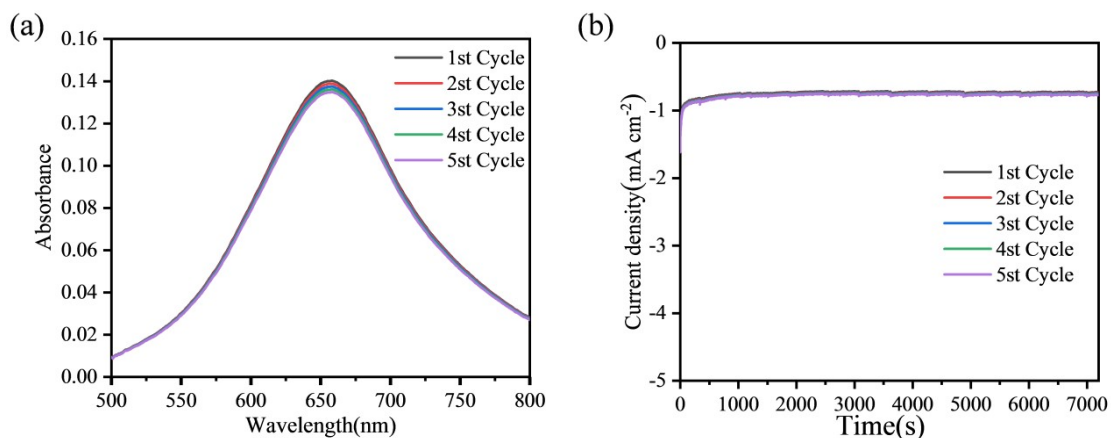

**Figure S7.** (a) UV-vis absorption spectra of different control experiments stained by indophenol assay for 2 h. (b) NH<sub>3</sub> yields and FEs of Ti<sub>3</sub>C<sub>2</sub>-B at -0.55 V for five cycles recorded in the N<sub>2</sub>-saturated electrolyte.

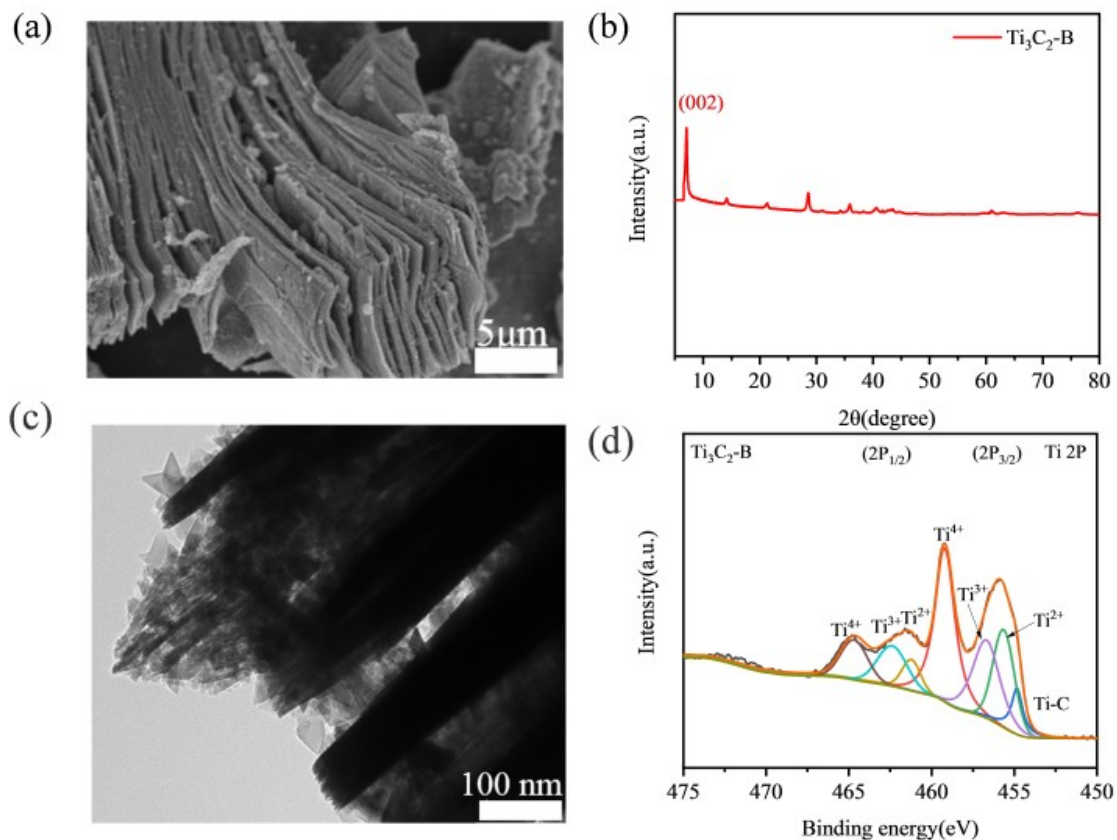

**Figure S8.** (a) SEM image (b) XRD (c)TEM (d) XPS for  $\text{Ti}_3\text{C}_2\text{-B}$  after stability test.

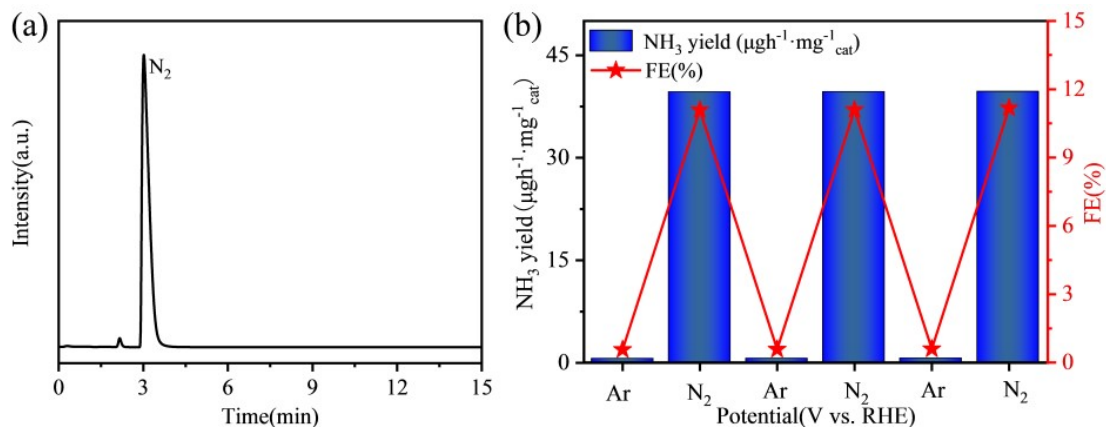

**Figure S9.** (a) Gas chromatography curves of  $\text{N}_2$  (b)  $\text{NH}_3$  yields and FEs of  $\text{Ti}_3\text{C}_2\text{-B}$  with alternating 2 h cycles between  $\text{N}_2$ -saturated and Ar-saturated electrolytes at optimum potential (-0.55 V) for a total of 12 h.

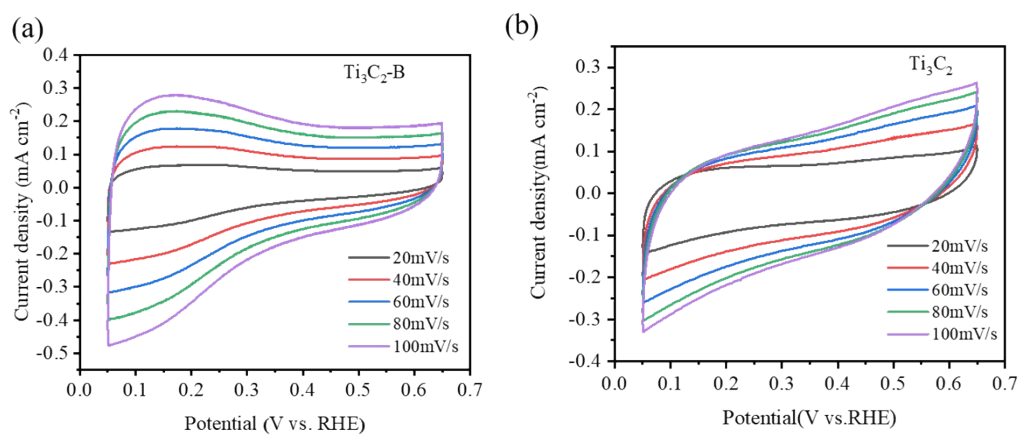

**Figure S10.** (a) and (b) Cyclic voltammograms (CVs) of  $\text{Ti}_3\text{C}_2\text{-B}$  and  $\text{Ti}_3\text{C}_2$  at different scan rates

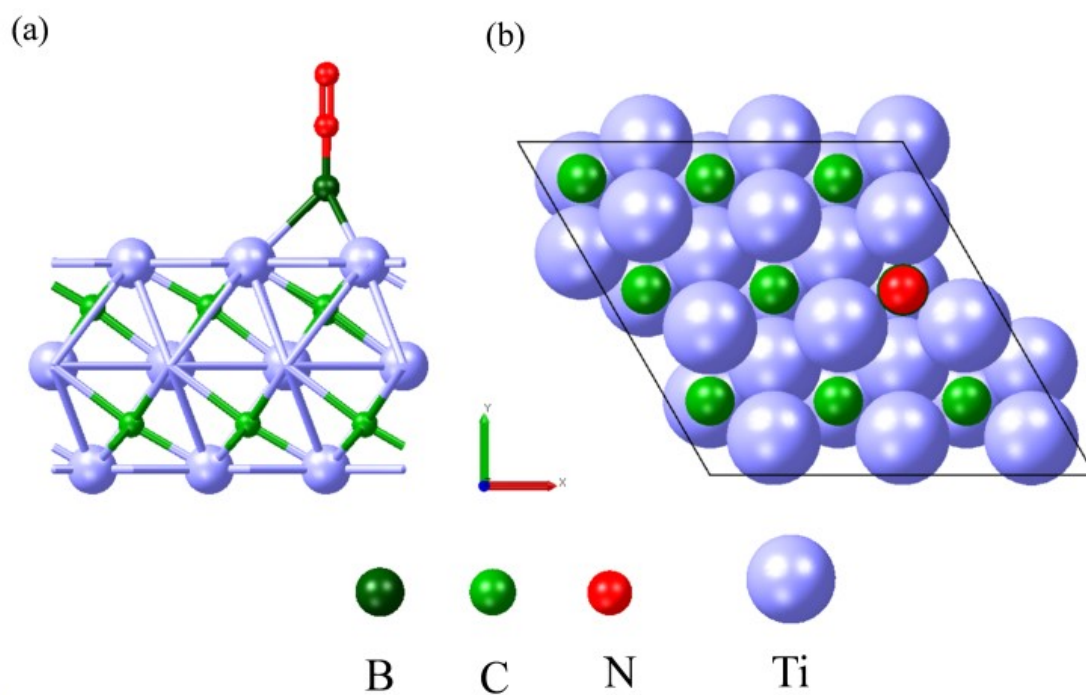

**Figure S11.** (a) side and (b) top views of  $\text{Ti}_3\text{C}_2\text{-B}$

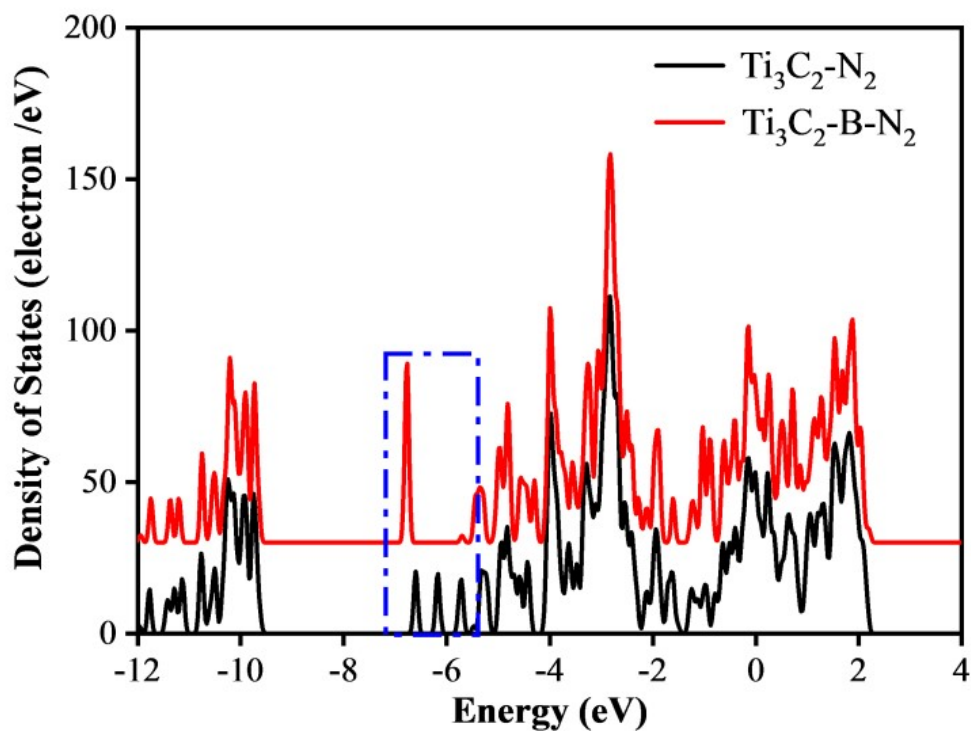

Figure S12. Density of states of the  $\text{Ti}_3\text{C}_2\text{-N}_2$  and  $\text{Ti}_3\text{C}_2\text{-B-N}_2$

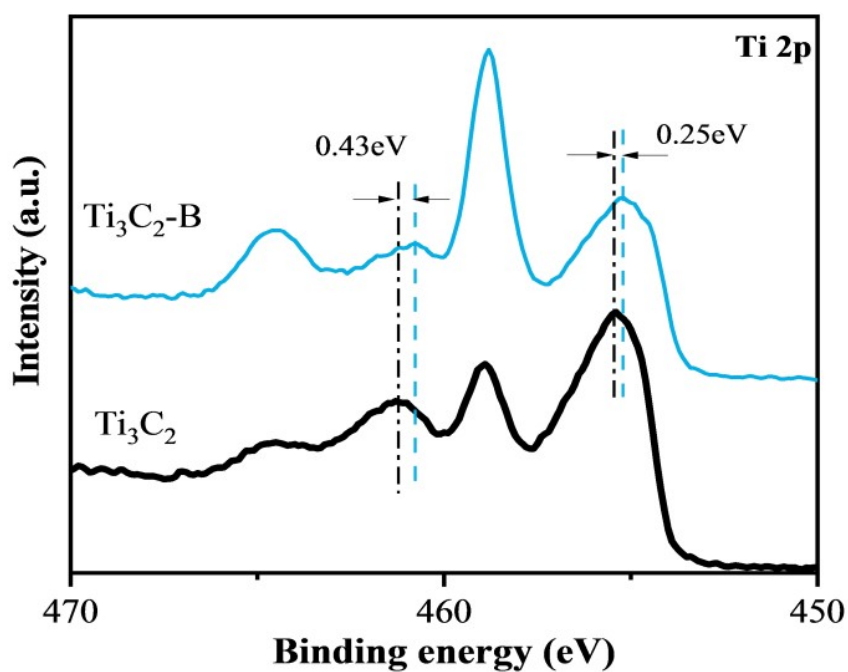

Figure S13. XPS spectra of Ti 2p for  $\text{Ti}_3\text{C}_2$  and  $\text{Ti}_3\text{C}_2\text{-B}$

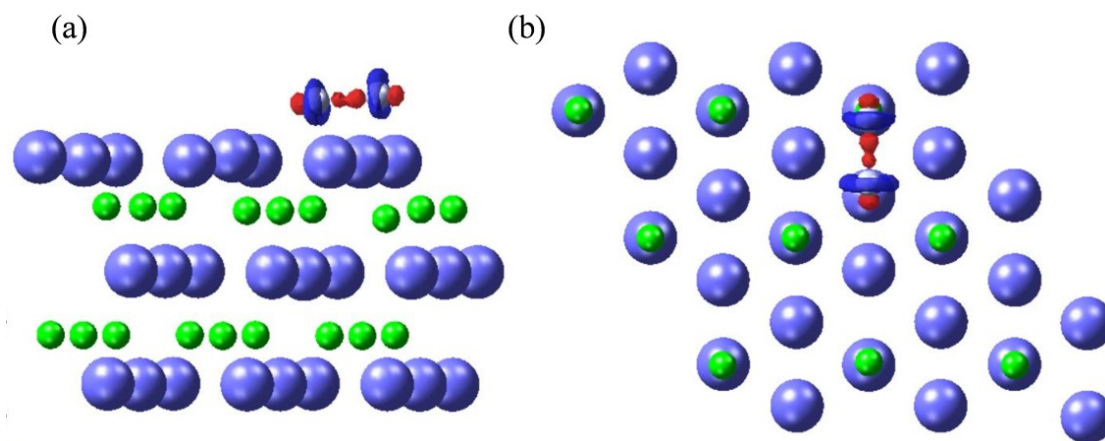

**Figure S14.** (a) side and (b) top views of charge difference for  $\text{Ti}_3\text{C}_2$

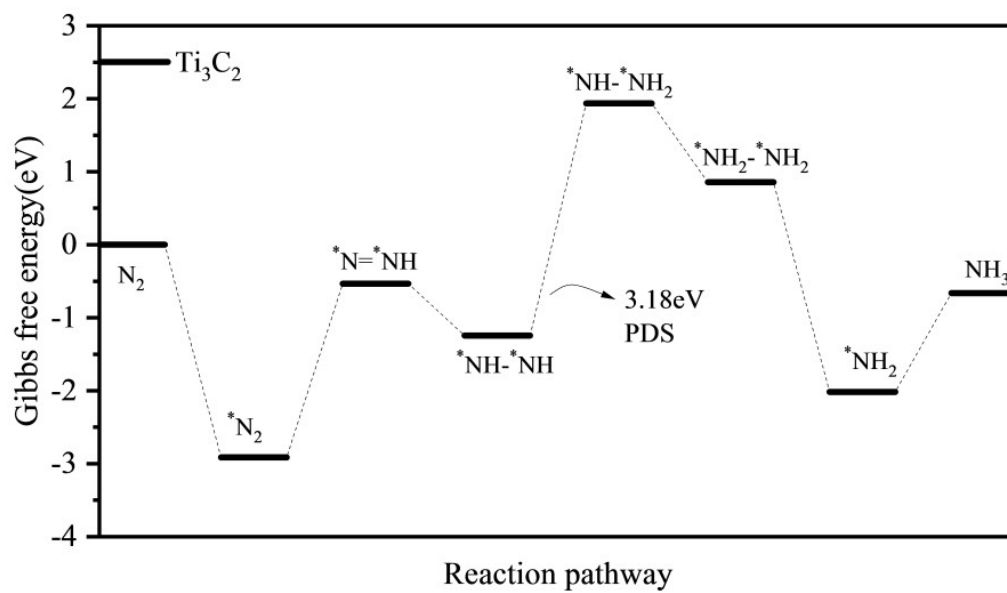

**Figure S15.** Free energy diagrams of enzymatic NRR pathway on  $\text{Ti}_3\text{C}_2$

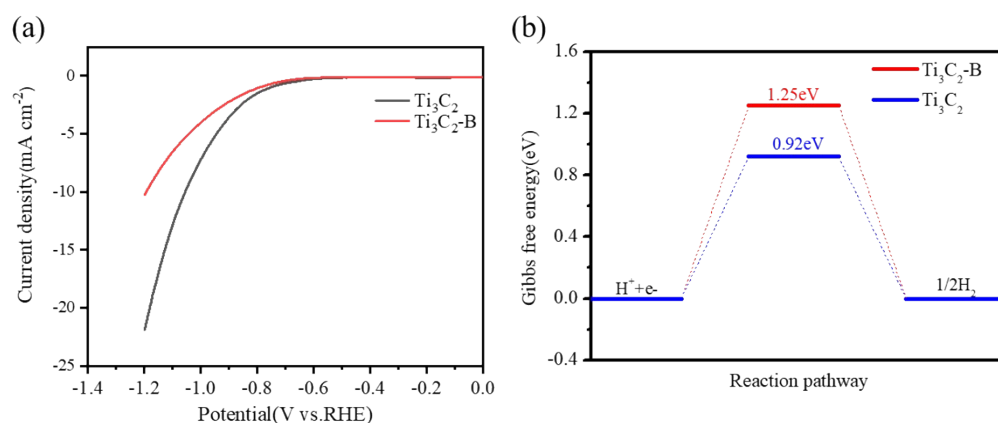

**Figure S16.** (a) LSV curves of electrocatalytic hydrogen production of  $\text{Ti}_3\text{C}_2$  and  $\text{Ti}_3\text{C}_2\text{-B}$ . (b) Free-energy scheme of hydrogen evolution reaction on  $\text{Ti}_3\text{C}_2$  and  $\text{Ti}_3\text{C}_2\text{-B}$  respectively.

**Table S1.** The comparison of  $\text{Ti}_3\text{C}_2\text{-B}$  catalyst with the reported catalysts for electrochemical NRR in aqueous solutions.

| Catalyst                                 | Electrolyte                     | $\text{NH}_3$ rate ( $\mu\text{g}_{\text{mat}}^{-1}$ ) | yield ( $\mu\text{g}_{\text{h}}^{-1}$ ) | Faraday Efficiency (%) | Ref.      |
|------------------------------------------|---------------------------------|--------------------------------------------------------|-----------------------------------------|------------------------|-----------|
| $\text{Ti}_3\text{C}_2\text{-B}$         | 0.05 M $\text{H}_2\text{SO}_4$  | 39.64                                                  |                                         | 11.85                  | This Work |
| Mxene-NiCoB                              | 0.1 M $\text{Na}_2\text{SO}_4$  | 38.7                                                   |                                         | 6.92                   | 1         |
| $\text{MnO}_2\text{-Ti}_3\text{C}_2$     | 0.1 M HCl                       | 34.12                                                  |                                         | 11.39                  | 2         |
| 1T- $\text{MoS}_2@\text{Ti}_3\text{C}_2$ | 0.1 M $\text{H}_2\text{SO}_4$   | 30.33                                                  |                                         | 10.94                  | 3         |
| BCN                                      | 0.1 M KOH                       | 21.62                                                  |                                         | 9.88                   | 4         |
| $\text{Ni-V}_4\text{C}_3\text{T}_x$      | 0.1 M KOH                       | 21.29                                                  |                                         | 8.04                   | 5         |
| $\text{Au-TiO}_{2-x}$                    | 0.1M HCl                        | 12.5                                                   |                                         | 10.2                   | 6         |
| $\text{Ti}_3\text{C}_2\text{-medium F}$  | 0.01 M $\text{Na}_2\text{SO}_4$ | 3.04                                                   |                                         | 7.4                    | 7         |

|                                                     |                                       |      |       |    |
|-----------------------------------------------------|---------------------------------------|------|-------|----|
| Nb <sub>2</sub> O <sub>5</sub> /C-800<br>Mxenes     | 0.1 M HCl                             | 29.1 | 11.5  | 8  |
| Pd-TiO <sub>2</sub>                                 | 0.1 M Na <sub>2</sub> SO <sub>4</sub> | 17.4 | 12.7  | 9  |
| 2.0%Cu/OV-<br>TiO <sub>2</sub>                      | 0.05 M H <sub>2</sub> SO <sub>4</sub> | 13.6 | 17.9  | 10 |
| BiOCl@Ti <sub>3</sub> C <sub>2</sub> T <sub>x</sub> | 0.1 M HCl                             | 4.06 | 11.98 | 11 |
| Defective BCN                                       | 0.1 M KOH                             | 20.9 | 18.9  | 12 |

## References

1. C. Wang, Q.-C. Wang, K.-X. Wang, M. De Ras, K. Chu, L.-L. Gu, F. Lai, S.-Y. Qiu, H. Guo, P.-J. Zuo, J. Hofkens and X.-D. Zhu, *Journal of Energy Chemistry*, 2023, **77**, 469-478.
2. W. Kong, F. Gong, Q. Zhou, G. Yu, L. Ji, X. Sun, A. M. Asiri, T. Wang, Y. Luo and Y. Xu, *Journal of Materials Chemistry A*, 2019, **7**, 18823-18827.
3. X. Xu, B. Sun, Z. Liang, H. Cui and J. Tian, *ACS Appl Mater Interfaces*, 2020, **12**, 26060-26067.
4. L. Shi, S. Bi, Y. Qi, G. Ning and J. Ye, *J Colloid Interface Sci*, 2023, **641**, 577-584.
5. C.-F. Du, L. Yang, K. Tang, W. Fang, X. Zhao, Q. Liang, X. Liu, H. Yu, W. Qi and Q. Yan, *Materials Chemistry Frontiers*, 2021, **5**, 2338-2346.
6. P. Yang, H. Guo, H. Wu, F. Zhang, J. Liu, M. Li, Y. Yang, Y. Cao, G. Yang and Y. Zhou, *J Colloid Interface Sci*, 2023, **636**, 184-193.
7. Y. Ding, J. Zhang, A. Guan, Q. Wang, S. Li, A. M. Al-Enizi, L. Qian, L. Zhang and G. Zheng, *Nano Converg*, 2021, **8**, 14.
8. M. Zhang, H. Yin, F. Jin, J. Liu, X. Ji, A. Du, W. Yang and Z. Liu, *Green Energy & Environment*, 2022, **1** 2468-0257.
9. H. J. Chen, G. R. Deng, Z. S. Feng, Z. Q. Xu, M. Y. Yang, Y. Huang, Q. Peng, T. Li and Y. Wang, *Chem Commun (Camb)*, 2022, **58**, 3214-3217.
10. W. P. Utomo, H. Wu and Y. H. Ng, *Small*, 2022, **18**, e2200996.
11. Y. Wang, M. Batmunkh, H. Mao, H. Li, B. Jia, S. Wu, D. Liu, X. Song, Y. Sun and T. Ma, *Chinese Chemical Letters*, 2022, **33**, 394-398.
12. W. Lin, H. Chen, G. Lin, S. Yao, Z. Zhang, J. Qi, M. Jing, W. Song, J. Li, X. Liu, J. Fu and S. Dai, *Angew Chem Int Ed Engl*, 2022, **61**, e202207807.
